# Supplementary material
Source: publisher figshare collection journal article supplement (https://asha.figshare.com/articles/dataset/_/23681505)
Supplement: Supplementary file 1 [file 1]

**Supplemental Material S1.** A sample 2-column note form used to teach note-taking on famous athletes.

**2-Column Athlete Notes**

Participant: \_\_\_\_\_ Instructor: \_\_\_\_\_ Date: \_\_\_\_\_

Topic \_\_\_\_\_

|                         |  |
|-------------------------|--|
| Early Life              |  |
| About the Sport         |  |
| Professional Highlights |  |
| Other Accomplishments   |  |
| Fun Facts               |  |
