# Supplementary material
Source: publisher figshare collection journal article supplement (https://asha.figshare.com/articles/dataset/_/23681505)
Supplement: Supplementary file 2 [file 1]

## **Supplemental Material S2. A sample expository text on Michael Jordan (famous athlete) used in this study.**

Lexile Measure: 1080L  
Mean Sentence Length: 15.78  
Mean Log Word Frequency: 3.28  
Word Count: 505

### **Michael Jordan**

Michael Jordan or MJ is one of the greatest basketball legends of all time. He and his famous sneaker have set records and made a difference in people's lives around the world.

MJ was born in Brooklyn, New York, in 1963. During high school, MJ excelled in basketball, baseball, and football. As a sophomore, he tried out for the varsity basketball team, but coaches thought he was too short. MJ maintained his determination and played on the junior varsity team, scoring 40 points in multiple games. After that and growing four inches in a year, MJ earned a spot on varsity, where he led his team to victories. MJ was offered a spot on many college basketball teams, and chose the University of North Carolina Tar Heels.

After attending UNC for three years, MJ was drafted by the Chicago Bulls. He quickly emerged as a National Basketball Association, or NBA, league star. He entertained crowds with his prolific scoring and high jumps, which earned him the nickname "Air Jordan". He was on the cover of the *Sports Illustrated* magazine and was voted Rookie of the Year. The next year, MJ's season was cut short because of a broken foot, but he bounced back from his injury with a record 63 points in a single playoff game.

MJ played in the NBA for 15 seasons. In the middle of his basketball career, MJ had a terrible personal setback when his father was shot by two teenagers who were stealing his car. To take a break from basketball and fulfill a dream of his father, MJ joined the Minor League Baseball league. After two years, he returned to his main passion of basketball and continued to be a star player with the Bulls and later the Washington Wizards.

MJ set more records than any other player in NBA history. He won the Most Valuable Player award five times and was a 14-time NBA All-Star. In 1999, he was named the greatest North American athlete of the 20th century by ESPN. Other famous NBA players, including LeBron James and Dwyane Wade, said MJ was their role model growing up. In 2016, MJ was awarded the Presidential Medal of Freedom for his lifetime contributions to America and the world.

MJ's stardom extends far beyond the basketball court. He is a successful billionaire businessman. He was sponsored by brands such as Nike, Coca-Cola, Gatorade, and McDonalds. He has many business interests, including the Charlotte Hornets basketball team and a motorcycle racing team. MJ is a generous philanthropist. He has donated and raised many millions of dollars for charitable causes, including medical clinics, hurricane victims, and the Make-A-Wish foundation for very ill children.

MJ's most famous product has always been the Air Jordan sneaker. It became so popular that people have even been robbed of their Air Jordans at gunpoint. Air Jordans are still one of the top selling Nike products, more than 32 years after MJ introduced them. You may even have a pair of Air Jordans in your closet.
